# Supplementary material for: Heterogeneity, Inherent and Acquired Drug Resistance in Patient-Derived Organoids Models of Primary Liver Cancer
Source: Research Square preprint supplement (doi:10.21203/rs.3.rs-1229184/v1), 2022-01-10
Supplement: Supplementary file 1 [file 36d461895d87815af6b6c2b0.docx]

| Table S4. Gene sets enriched in the sorafenib-resistant organoids. | | | | |  | | | |  | | | |
| --- | --- | --- | --- | --- | --- | --- | --- | --- | --- | --- | --- | --- |
| Gene set | Size | | ES | NES | | P value | | | | FDR | | | |
| MANALO_HYPOXIA_DN | 279 | | 0.66 | 3.24 | | <0.001 | | | | <0.001 | | | |
| WONG_EMBRYONIC_STEM_CELL_CORE | 317 | | 0.55 | 2.71 | | <0.001 | | | | <0.001 | | | |
| SCHUHMACHER_MYC_TARGETS_UP | 76 | | 0.65 | 2.66 | | <0.001 | | | | <0.001 | | | |
| FUJII_YBX1_TARGETS_DN | 181 | | 0.56 | 2.61 | | <0.001 | | | | <0.001 | | | |
| SOTIRIOU_BREAST_CANCER_GRADE_1_VS_3_UP | 147 | | 0.56 | 2.58 | | <0.001 | | | | <0.001 | | | |
| KAUFFMANN_MELANOMA_RELAPSE_UP | 59 | | 0.66 | 2.52 | | <0.001 | | | | <0.001 | | | |
| KOBAYASHI_EGFR_SIGNALING_24HR_DN | 238 | | 0.53 | 2.52 | | <0.001 | | | | <0.001 | | | |
| FOURNIER_ACINAR_DEVELOPMENT_LATE_2 | 269 | | 0.52 | 2.51 | | <0.001 | | | | <0.001 | | | |
| MUELLER_PLURINET | 272 | | 0.52 | 2.51 | | <0.001 | | | | <0.001 | | | |
| DUTERTRE_ESTRADIOL_RESPONSE_24HR_UP | 291 | | 0.51 | 2.49 | | <0.001 | | | | <0.001 | | | |
| DUTERTRE_ESTRADIOL_RESPONSE_6HR_UP | 194 | | 0.54 | 2.48 | | <0.001 | | | | <0.001 | | | |
| WHITEFORD_PEDIATRIC_CANCER_MARKERS | 110 | | 0.56 | 2.47 | | <0.001 | | | | <0.001 | | | |
| GARCIA_TARGETS_OF_FLI1_AND_DAX1_DN | 140 | | 0.55 | 2.46 | | <0.001 | | | | <0.001 | | | |
| REN_BOUND_BY_E2F | 55 | | 0.64 | 2.45 | | <0.001 | | | | <0.001 | | | |
| VERNELL_RETINOBLASTOMA_PATHWAY_UP | 68 | | 0.62 | 2.44 | | <0.001 | | | | <0.001 | | | |
| SARRIO_EPITHELIAL_MESENCHYMAL_TRANSITION_UP | 152 | | 0.53 | 2.43 | | <0.001 | | | | <0.001 | | | |
| DANG_MYC_TARGETS_UP | 120 | | 0.56 | 2.42 | | <0.001 | | | | <0.001 | | | |
| ROSTY_CERVICAL_CANCER_PROLIFERATION_CLUSTER | 137 | | 0.54 | 2.41 | | <0.001 | | | | <0.001 | | | |
| ELVIDGE_HIF1A_TARGETS_UP | 63 | | 0.61 | 2.4 | | <0.001 | | | | <0.001 | | | |
| GRAHAM_NORMAL_QUIESCENT_VS_NORMAL_DIVIDING_DN | 80 | | 0.58 | 2.4 | | <0.001 | | | | <0.001 | | | |
| ELVIDGE_HIF1A_AND_HIF2A_TARGETS_UP | 37 | | 0.69 | 2.4 | | <0.001 | | | | <0.001 | | | |
| MEBARKI_HCC_PROGENITOR_FZD8CRD_UP | 420 | | 0.47 | 2.38 | | <0.001 | | | | <0.001 | | | |
| KARLSSON_TGFB1_TARGETS_UP | 113 | | 0.54 | 2.37 | | <0.001 | | | | <0.001 | | | |
| SCHLOSSER_MYC_TARGETS_REPRESSED_BY_SERUM | 145 | | 0.52 | 2.37 | | <0.001 | | | | <0.001 | | | |
| RUIZ_TNC_TARGETS_DN | 127 | | 0.55 | 2.36 | | | | <0.001 | | | | <0.001 | | | |
| PUJANA_BRCA2_PCC_NETWORK | 378 | | 0.48 | 2.36 | | | | <0.001 | | | | <0.001 | | | |
| RHODES_UNDIFFERENTIATED_CANCER | 62 | | 0.61 | 2.35 | | | | <0.001 | | | | <0.001 | | | |
| MOREAUX_B_LYMPHOCYTE_MATURATION_BY_TACI_DN | 74 | | 0.57 | 2.35 | | | | <0.001 | | | | <0.001 | | | |
| NAKAMURA_CANCER_MICROENVIRONMENT_DN | 38 | | 0.65 | 2.34 | | | | <0.001 | | | | <0.001 | | | |
| BENPORATH_PROLIFERATION | 136 | | 0.52 | 2.33 | | | | <0.001 | | | | <0.001 | | | |
| SONG_TARGETS_OF_IE86_CMV_PROTEIN | 52 | | 0.61 | 2.32 | | | | <0.001 | | | | <0.001 | | | |
| FRASOR_RESPONSE_TO_SERM_OR_FULVESTRANT_DN | 47 | | 0.64 | 2.31 | | | | <0.001 | | | | <0.001 | | | |
| PUJANA_BRCA_CENTERED_NETWORK | 117 | | 0.54 | 2.3 | | | | <0.001 | | | | <0.001 | | | |
| SCHLOSSER_MYC_TARGETS_AND_SERUM_RESPONSE_UP | 46 | | 0.62 | 2.27 | | | | <0.001 | | | | 3.41E-05 | | | |
| ZHOU_CELL_CYCLE_GENES_IN_IR_RESPONSE_6HR | 81 | | 0.56 | 2.27 | | | | <0.001 | | | | 3.31E-05 | | | |
| MISSIAGLIA_REGULATED_BY_METHYLATION_DN | 113 | | 0.51 | 2.26 | | | | <0.001 | | | | 3.22E-05 | | | |
| WAKASUGI_HAVE_ZNF143_BINDING_SITES | 54 | | 0.61 | 2.26 | | | | <0.001 | | | | 3.13E-05 | | | |
| MOREAUX_MULTIPLE_MYELOMA_BY_TACI_DN | 170 | | 0.48 | 2.26 | | | | <0.001 | | | | 3.05E-05 | | | |
| FERREIRA_EWINGS_SARCOMA_UNSTABLE_VS_STABLE_UP | 144 | | 0.51 | 2.24 | | | | <0.001 | | | | 2.97E-05 | | | |
| WINNEPENNINCKX_MELANOMA_METASTASIS_UP | 152 | | 0.5 | 2.24 | | | | <0.001 | | | | 2.90E-05 | | | |
| WANG_RESPONSE_TO_GSK3_INHIBITOR_SB216763_DN | 309 | | 0.45 | 2.24 | | | | <0.001 | | | | 2.83E-05 | | | |
| KONG_E2F3_TARGETS | 86 | | 0.53 | 2.23 | | | | <0.001 | | | | 5.59E-05 | | | |
| GRADE_COLON_AND_RECTAL_CANCER_UP | 266 | | 0.45 | 2.23 | | | | <0.001 | | | | 5.46E-05 | | | |
| SANSOM_APC_TARGETS_REQUIRE_MYC | 195 | | 0.48 | 2.23 | | | | <0.001 | | | | 5.34E-05 | | | |
| BILANGES_SERUM_AND_RAPAMYCIN_SENSITIVE_GENES | 66 | | 0.56 | 2.23 | | | | <0.001 | | | | 5.22E-05 | | | |
| ELVIDGE_HYPOXIA_DN | 139 | | 0.51 | 2.22 | | | | <0.001 | | | | 5.11E-05 | | | |
| GARY_CD5_TARGETS_DN | 402 | | 0.44 | 2.22 | | | | <0.001 | | | | 5.00E-05 | | | |
| PUJANA_BREAST_CANCER_WITH_BRCA1_MUTATED_UP | 54 | | 0.59 | 2.2 | | | | <0.001 | | | | 9.73E-05 | | | |
| PUJANA_XPRSS_INT_NETWORK | 164 | | 0.49 | 2.19 | | | | <0.001 | | | | 1.44E-04 | | | |
| KAMMINGA_EZH2_TARGETS | 39 | | 0.62 | 2.18 | | | | <0.001 | | | | 1.65E-04 | | | |
| YAO_TEMPORAL_RESPONSE_TO_PROGESTERONE_CLUSTER_11 | 84 | | 0.53 | 2.17 | | | | <0.001 | | | | 2.10E-04 | | | |
| BURTON_ADIPOGENESIS_PEAK_AT_16HR | 38 | | 0.61 | 2.16 | | | | <0.001 | | | | 2.06E-04 | | | |
| SCHLOSSER_MYC_TARGETS_AND_SERUM_RESPONSE_DN | 48 | | 0.59 | 2.16 | | | | <0.001 | | | | 2.02E-04 | | | |
| ABRAMSON_INTERACT_WITH_AIRE | 41 | | 0.61 | 2.16 | | | | <0.001 | | | | 1.98E-04 | | | |
| ZHOU_CELL_CYCLE_GENES_IN_IR_RESPONSE_24HR | 115 | | 0.5 | 2.15 | | | | <0.001 | | | | 2.82E-04 | | | |
| VECCHI_GASTRIC_CANCER_EARLY_UP | 378 | | 0.43 | 2.15 | | | | <0.001 | | | | 2.77E-04 | | | |
| KAUFFMANN_DNA_REPLICATION_GENES | 130 | | 0.48 | 2.13 | | | | <0.001 | | | | 3.69E-04 | | | |
| WHITFIELD_CELL_CYCLE_G1_S | 121 | | 0.49 | 2.13 | | | | <0.001 | | | | 4.02E-04 | | | |
| BASAKI_YBX1_TARGETS_UP | 250 | | 0.45 | 2.12 | | | | <0.001 | | | | 5.36E-04 | | | |
| FEVR_CTNNB1_TARGETS_DN | 500 | | 0.41 | 2.11 | | | | <0.001 | | | | 6.06E-04 | | | |
| LEE_LIVER_CANCER_SURVIVAL_DN | 166 | | 0.45 | 2.11 | | | | <0.001 | | | | 6.16E-04 | | | |
| SCHLOSSER_MYC_AND_SERUM_RESPONSE_SYNERGY | 31 | | 0.62 | 2.11 | | | | <0.001 | | | | 6.26E-04 | | | |
| YAO_TEMPORAL_RESPONSE_TO_PROGESTERONE_CLUSTER_14 | 131 | | 0.46 | 2.11 | | | | <0.001 | | | | 6.52E-04 | | | |
| KAUFFMANN_DNA_REPAIR_GENES | 212 | | 0.44 | 2.1 | | | | <0.001 | | | | 7.71E-04 | | | |
| STEIN_ESRRA_TARGETS_RESPONSIVE_TO_ESTROGEN_DN | 39 | | 0.6 | 2.09 | | | | <0.001 | | | | 7.95E-04 | | | |
| ZHANG_RESPONSE_TO_CANTHARIDIN_DN | 65 | | 0.54 | 2.09 | | | | <0.001 | | | | 8.71E-04 | | | |
| KIM_MYC_AMPLIFICATION_TARGETS_UP | 164 | | 0.46 | 2.09 | | | | <0.001 | | | | 8.58E-04 | | | |
| BHATTACHARYA_EMBRYONIC_STEM_CELL | 61 | | 0.54 | 2.08 | | | | <0.001 | | | | 9.30E-04 | | | |
| LY_AGING_OLD_DN | 49 | | 0.55 | 2.07 | | | | <0.001 | | | | 1.03E-03 | | | |
| ZHAN_MULTIPLE_MYELOMA_PR_UP | 43 | | 0.58 | 2.05 | | | | <0.001 | | | | 1.35E-03 | | | |
| TARTE_PLASMA_CELL_VS_PLASMABLAST_DN | 277 | | 0.41 | 2.04 | | | | <0.001 | | | | 1.63E-03 | | | |
| ISHIDA_E2F_TARGETS | 50 | | 0.55 | 2.03 | | | | <0.001 | | | | 1.77E-03 | | | |
| MOLENAAR_TARGETS_OF_CCND1_AND_CDK4_DN | 57 | | 0.54 | 2.03 | | | | <0.001 | | | | 2.09E-03 | | | |
| MORI_EMU_MYC_LYMPHOMA_BY_ONSET_TIME_UP | 106 | | 0.48 | 2.02 | | | | <0.001 | | | | 2.28E-03 | | | |
| BERENJENO_TRANSFORMED_BY_RHOA_UP | 490 | | 0.39 | 2 | | | | <0.001 | | | | 2.69E-03 | | | |
| CROONQUIST_IL6_DEPRIVATION_DN | 90 | | 0.46 | 1.98 | | | | <0.001 | | | | 3.43E-03 | | | |
| TOYOTA_TARGETS_OF_MIR34B_AND_MIR34C | 416 | | 0.39 | 1.98 | | | | <0.001 | | | | 3.40E-03 | | | |
| BILANGES_RAPAMYCIN_SENSITIVE_VIA_TSC1_AND_TSC2 | 65 | | 0.51 | 1.98 | | | | <0.001 | | | | 3.58E-03 | | | |
| BLANCO_MELO_BRONCHIAL_EPITHELIAL_CELLS | 162 | | 0.43 | 1.97 | | | | <0.001 | | | | 3.59E-03 | | | |
| _INFLUENZA_A_DEL_NS1_INFECTION_DN | |  | |  | | |  | | | |  | | | |
| BOYAULT_LIVER_CANCER_SUBCLASS_G123_UP | 44 | | 0.54 | 1.97 | | | | <0.001 | | | | 3.57E-03 | | | |
| IRITANI_MAD1_TARGETS_DN | 40 | | 0.57 | 1.97 | | | | <0.001 | | | | 3.56E-03 | | | |
| ODONNELL_TARGETS_OF_MYC_AND_TFRC_DN | 43 | | 0.55 | 1.97 | | | | <0.001 | | | | 3.59E-03 | | | |
| COLDREN_GEFITINIB_RESISTANCE_UP | 80 | | 0.48 | 1.97 | | | | <0.001 | | | | 3.59E-03 | | | |
| ZHANG_BREAST_CANCER_PROGENITORS_UP | 399 | | 0.38 | 1.97 | | | | <0.001 | | | | 3.63E-03 | | | |
| SENGUPTA_NASOPHARYNGEAL_CARCINOMA_UP | 241 | | 0.4 | 1.96 | | | | <0.001 | | | | 3.90E-03 | | | |
| MULLIGAN_NTF3_SIGNALING_VIA_INSR_AND_IGF1R_UP | 18 | | 0.68 | 1.96 | | | | <0.001 | | | | 3.87E-03 | | | |
| EPPERT_PROGENITOR | 122 | | 0.44 | 1.95 | | | | <0.001 | | | | 4.06E-03 | | | |
| BENPORATH_ES_1 | 306 | | 0.4 | 1.95 | | | | <0.001 | | | | 4.10E-03 | | | |
| PUJANA_BREAST_CANCER_LIT_INT_NETWORK | 98 | | 0.46 | 1.95 | | | | <0.001 | | | | 4.09E-03 | | | |
| KANG_DOXORUBICIN_RESISTANCE_UP | 54 | | 0.51 | 1.91 | | | | <0.001 | | | | 5.96E-03 | | | |
| ONDER_CDH1_TARGETS_1_DN | 129 | | 0.43 | 1.91 | | | | <0.001 | | | | 5.98E-03 | | | |
| GRAHAM_CML_DIVIDING_VS_NORMAL_QUIESCENT_UP | 152 | | 0.43 | 1.91 | | | | <0.001 | | | | 6.17E-03 | | | |
| BURTON_ADIPOGENESIS_3 | 92 | | 0.45 | 1.89 | | | | <0.001 | | | | 7.17E-03 | | | |
| FISCHER_G1_S_CELL_CYCLE | 165 | | 0.41 | 1.89 | | | | <0.001 | | | | 7.28E-03 | | | |
| BILD_MYC_ONCOGENIC_SIGNATURE | 175 | | 0.4 | 1.88 | | | | <0.001 | | | | 8.01E-03 | | | |
| FINETTI_BREAST_CANCER_KINOME_RED | 16 | | 0.67 | 1.88 | | | | <0.001 | | | | 8.20E-03 | | | |
| LI_WILMS_TUMOR_VS_FETAL_KIDNEY_1_DN | 139 | | 0.42 | 1.88 | | | | <0.001 | | | | 8.30E-03 | | | |
| YU_BAP1_TARGETS | 26 | | 0.58 | 1.88 | | | | 3.07E-03 | | | | 8.24E-03 | | | |
| ELVIDGE_HYPOXIA_BY_DMOG_DN | 52 | | 0.51 | 1.88 | | | | <0.001 | | | | 8.30E-03 | | | |
| CROONQUIST_NRAS_SIGNALING_DN | 68 | | 0.47 | 1.88 | | | | <0.001 | | | | 8.27E-03 | | | |
| DAIRKEE_CANCER_PRONE_RESPONSE_BPA | 44 | | 0.52 | 1.87 | | | | <0.001 | | | | 8.41E-03 | | | |
| CHEMNITZ_RESPONSE_TO_PROSTAGLANDIN_E2_UP | 128 | | 0.42 | 1.86 | | | | <0.001 | | | | 9.19E-03 | | | |
| BOYAULT_LIVER_CANCER_SUBCLASS_G3_DN | 35 | | -0.63 | -1.83 | | | | 1.43E-03 | | | | 9.97E-03 | | | |
| SANSOM_APC_TARGETS_DN | 212 | | -0.49 | -1.83 | | | | <0.001 | | | | 9.67E-03 | | | |
| ZHU_SKIL_TARGETS_UP | 18 | | -0.74 | -1.83 | | | | <0.001 | | | | 9.68E-03 | | | |
| SCHUETZ_BREAST_CANCER_DUCTAL_INVASIVE_UP | 161 | | -0.51 | -1.84 | | | | <0.001 | | | | 9.43E-03 | | | |
| ZIRN_TRETINOIN_RESPONSE_WT1_UP | 17 | | -0.74 | -1.84 | | | | 1.56E-03 | | | | 9.50E-03 | | | |
| GROSS_ELK3_TARGETS_DN | 24 | | -0.69 | -1.84 | | | | <0.001 | | | | 9.26E-03 | | | |
| CERVERA_SDHB_TARGETS_2 | 79 | | -0.55 | -1.84 | | | | <0.001 | | | | 8.72E-03 | | | |
| KIM_BIPOLAR_DISORDER_OLIGODENDROCYTE | 31 | | -0.64 | -1.85 | | | | <0.001 | | | | 8.67E-03 | | | |
| _DENSITY_CORR_DN |  | |  |  | | | |  | | | |  | | | |
| LI_CISPLATIN_RESISTANCE_UP | 16 | | -0.74 | -1.85 | | | | 1.54E-03 | | | | 8.55E-03 | | | |
| GRAESSMANN_APOPTOSIS_BY_SERUM_DEPRIVATION_DN | 180 | | -0.5 | -1.85 | | | | <0.001 | | | | 8.64E-03 | | | |
| BUFFA_HYPOXIA_METAGENE | 48 | | -0.6 | -1.85 | | | | <0.001 | | | | 8.23E-03 | | | |
| IZADPANAH_STEM_CELL_ADIPOSE_VS_BONE_DN | 72 | | -0.56 | -1.86 | | | | <0.001 | | | | 7.06E-03 | | | |
| ISSAEVA_MLL2_TARGETS | 36 | | -0.64 | -1.86 | | | | <0.001 | | | | 6.97E-03 | | | |
| TURASHVILI_BREAST_DUCTAL_CARCINOMA | 34 | | -0.63 | -1.86 | | | | <0.001 | | | | 6.90E-03 | | | |
| _VS_LOBULAR_NORMAL_DN |  | |  |  | | | |  | | | |  | | | |
| SWEET_KRAS_TARGETS_UP | 59 | | -0.58 | -1.87 | | | | <0.001 | | | | 6.63E-03 | | | |
| CORRE_MULTIPLE_MYELOMA_DN | 31 | | -0.65 | -1.87 | | | | <0.001 | | | | 6.65E-03 | | | |
| SARRIO_EPITHELIAL_MESENCHYMAL_TRANSITION_DN | 103 | | -0.54 | -1.87 | | | | <0.001 | | | | 6.62E-03 | | | |
| SERVITJA_ISLET_HNF1A_TARGETS_DN | 68 | | -0.58 | -1.87 | | | | <0.001 | | | | 6.46E-03 | | | |
| SU_LIVER | 27 | | -0.68 | -1.87 | | | | 1.50E-03 | | | | 6.48E-03 | | | |
| HOOI_ST7_TARGETS_DN | 88 | | -0.56 | -1.87 | | | | <0.001 | | | | 6.39E-03 | | | |
| SATO_SILENCED_BY_METHYLATION_IN_PANCREATIC_CANCER_1 | 220 | | -0.5 | -1.87 | | | | <0.001 | | | | 6.27E-03 | | | |
| VANHARANTA_UTERINE_FIBROID_DN | 52 | | -0.6 | -1.87 | | | | <0.001 | | | | 6.33E-03 | | | |
| SWEET_LUNG_CANCER_KRAS_DN | 223 | | -0.5 | -1.88 | | | | <0.001 | | | | 6.20E-03 | | | |
| BLANCO_MELO_RESPIRATORY_SYNCYTIAL_VIRUS | 170 | | -0.51 | -1.88 | | | | <0.001 | | | | 5.96E-03 | | | |
| _INFECTION_A594_CELLS_UP |  | |  |  | | | |  | | | |  | | | |
| SENESE_HDAC1_AND_HDAC2_TARGETS_DN | 141 | | -0.52 | -1.88 | | | | <0.001 | | | | 5.85E-03 | | | |
| VECCHI_GASTRIC_CANCER_ADVANCED_VS_EARLY_DN | 105 | | -0.54 | -1.88 | | | | <0.001 | | | | 5.77E-03 | | | |
| KHETCHOUMIAN_TRIM24_TARGETS_UP | 30 | | -0.67 | -1.88 | | | | <0.001 | | | | 5.85E-03 | | | |
| MINGUEZ_LIVER_CANCER_VASCULAR_INVASION_DN | 16 | | -0.76 | -1.88 | | | | <0.001 | | | | 5.92E-03 | | | |
| BASAKI_YBX1_TARGETS_DN | 344 | | -0.49 | -1.89 | | | | <0.001 | | | | 5.85E-03 | | | |
| GESERICK_TERT_TARGETS_DN | 19 | | -0.74 | -1.89 | | | | <0.001 | | | | 5.86E-03 | | | |
| KIM_GLIS2_TARGETS_UP | 44 | | -0.62 | -1.89 | | | | <0.001 | | | | 5.75E-03 | | | |
| WATANABE_COLON_CANCER_MSI_VS_MSS_DN | 30 | | -0.67 | -1.89 | | | | <0.001 | | | | 5.66E-03 | | | |
| MOHANKUMAR_HOXA1_TARGETS_DN | 98 | | -0.56 | -1.89 | | | | <0.001 | | | | 5.73E-03 | | | |
| IIZUKA_LIVER_CANCER_PROGRESSION_G2_G3_UP | 24 | | -0.71 | -1.89 | | | | <0.001 | | | | 5.78E-03 | | | |
| BLANCO_MELO_COVID19_BRONCHIAL_EPITHELIAL_CELLS | 33 | | -0.66 | -1.89 | | | | 1.43E-03 | | | | 5.73E-03 | | | |
| _SARS_COV_2_INFECTION_DN |  | |  |  | | | |  | | | |  | | | |
| CASORELLI_ACUTE_PROMYELOCYTIC_LEUKEMIA_UP | 121 | | -0.54 | -1.9 | | | | <0.001 | | | | 5.69E-03 | | | |
| MIKKELSEN_MEF_ICP_WITH_H3K27ME3 | 56 | | -0.61 | -1.9 | | | | <0.001 | | | | 5.71E-03 | | | |
| CAIRO_HEPATOBLASTOMA_CLASSES_DN | 141 | | -0.53 | -1.9 | | | | <0.001 | | | | 5.16E-03 | | | |
| SHETH_LIVER_CANCER_VS_TXNIP_LOSS_PAM3 | 55 | | -0.6 | -1.9 | | | | 1.32E-03 | | | | 5.02E-03 | | | |
| BLANCO_MELO_MERS_COV_INFECTION_MCR5_CELLS_UP | 161 | | -0.52 | -1.91 | | | | <0.001 | | | | 4.54E-03 | | | |
| YAO_TEMPORAL_RESPONSE_TO_PROGESTERONE_CLUSTER_5 | 21 | | -0.71 | -1.91 | | | | <0.001 | | | | 4.59E-03 | | | |
| WINTER_HYPOXIA_UP | 86 | | -0.57 | -1.91 | | | | <0.001 | | | | 4.57E-03 | | | |
| GOZGIT_ESR1_TARGETS_UP | 98 | | -0.56 | -1.92 | | | | <0.001 | | | | 4.00E-03 | | | |
| VECCHI_GASTRIC_CANCER_EARLY_DN | 147 | | -0.53 | -1.92 | | | | <0.001 | | | | 4.04E-03 | | | |
| ODONNELL_TFRC_TARGETS_UP | 215 | | -0.52 | -1.92 | | | | <0.001 | | | | 3.85E-03 | | | |
| KINSEY_TARGETS_OF_EWSR1_FLII_FUSION_DN | 258 | | -0.51 | -1.93 | | | | <0.001 | | | | 3.72E-03 | | | |
| SCHAEFFER_PROSTATE_DEVELOPMENT_12HR_UP | 69 | | -0.6 | -1.93 | | | | <0.001 | | | | 3.75E-03 | | | |
| BAELDE_DIABETIC_NEPHROPATHY_UP | 54 | | -0.61 | -1.93 | | | | <0.001 | | | | 3.74E-03 | | | |
| MIKKELSEN_IPS_LCP_WITH_H3K4ME3 | 82 | | -0.57 | -1.93 | | | | <0.001 | | | | 3.80E-03 | | | |
| TSAI_RESPONSE_TO_RADIATION_THERAPY | 20 | | -0.75 | -1.93 | | | | 1.50E-03 | | | | 3.68E-03 | | | |
| CHIANG_LIVER_CANCER_SUBCLASS_PROLIFERATION_DN | 113 | | -0.55 | -1.94 | | | | <0.001 | | | | 3.68E-03 | | | |
| BERTUCCI_INVASIVE_CARCINOMA_DUCTAL_VS_LOBULAR_DN | 21 | | -0.76 | -1.94 | | | | <0.001 | | | | 3.33E-03 | | | |
| NAKAYAMA_SOFT_TISSUE_TUMORS_PCA2_DN | 42 | | -0.65 | -1.94 | | | | 1.38E-03 | | | | 3.30E-03 | | | |
| DUNNE_TARGETS_OF_AML1_MTG8_FUSION_UP | 24 | | -0.73 | -1.94 | | | | <0.001 | | | | 3.36E-03 | | | |
| LEE_AGING_CEREBELLUM_UP | 52 | | -0.62 | -1.95 | | | | <0.001 | | | | 3.32E-03 | | | |
| MIKKELSEN_MEF_LCP_WITH_H3K4ME3 | 73 | | -0.59 | -1.95 | | | | <0.001 | | | | 3.38E-03 | | | |
| PRAMOONJAGO_SOX4_TARGETS_UP | 47 | | -0.64 | -1.95 | | | | 1.39E-03 | | | | 3.36E-03 | | | |
| COATES_MACROPHAGE_M1_VS_M2_DN | 58 | | -0.61 | -1.95 | | | | <0.001 | | | | 3.10E-03 | | | |
| GROSS_HYPOXIA_VIA_ELK3_AND_HIF1A_UP | 126 | | -0.55 | -1.96 | | | | <0.001 | | | | 2.97E-03 | | | |
| GROSS_HYPOXIA_VIA_HIF1A_DN | 90 | | -0.59 | -1.96 | | | | <0.001 | | | | 2.84E-03 | | | |
| MCDOWELL_ACUTE_LUNG_INJURY_UP | 30 | | -0.7 | -1.96 | | | | <0.001 | | | | 2.88E-03 | | | |
| MIKKELSEN_ES_LCP_WITH_H3K4ME3 | 63 | | -0.61 | -1.96 | | | | <0.001 | | | | 2.95E-03 | | | |
| MIKKELSEN_IPS_ICP_WITH_H3K4ME3_AND_H327ME3 | 38 | | -0.67 | -1.97 | | | | <0.001 | | | | 2.59E-03 | | | |
| KORKOLA_YOLK_SAC_TUMOR | 33 | | -0.67 | -1.98 | | | | <0.001 | | | | 2.40E-03 | | | |
| CERVERA_SDHB_TARGETS_1_DN | 21 | | -0.76 | -1.98 | | | | <0.001 | | | | 2.20E-03 | | | |
| STEARMAN_LUNG_CANCER_EARLY_VS_LATE_DN | 42 | | -0.66 | -1.99 | | | | <0.001 | | | | 2.23E-03 | | | |
| CHEN_LVAD_SUPPORT_OF_FAILING_HEART_UP | 74 | | -0.61 | -2 | | | | <0.001 | | | | 1.62E-03 | | | |
| YAO_HOXA10_TARGETS_VIA_PROGESTERONE_UP | 44 | | -0.66 | -2 | | | | <0.001 | | | | 1.54E-03 | | | |
| RIGGINS_TAMOXIFEN_RESISTANCE_UP | 46 | | -0.65 | -2 | | | | <0.001 | | | | 1.53E-03 | | | |
| KIM_HYPOXIA | 16 | | -0.83 | -2.01 | | | | <0.001 | | | | 1.41E-03 | | | |
| DEMAGALHAES_AGING_UP | 35 | | -0.69 | -2.01 | | | | <0.001 | | | | 1.45E-03 | | | |
| BOQUEST_STEM_CELL_UP | 138 | | -0.56 | -2.02 | | | | <0.001 | | | | 1.35E-03 | | | |
| DUTERTRE_ESTRADIOL_RESPONSE_6HR_DN | 76 | | -0.6 | -2.02 | | | | <0.001 | | | | 1.33E-03 | | | |
| VANDESLUIS_COMMD1_TARGETS_GROUP_3_UP | 65 | | -0.63 | -2.02 | | | | <0.001 | | | | 1.22E-03 | | | |
| BHAT_ESR1_TARGETS_VIA_AKT1_DN | 64 | | -0.63 | -2.03 | | | | <0.001 | | | | 1.07E-03 | | | |
| HARRIS_HYPOXIA | 61 | | -0.64 | -2.03 | | | | <0.001 | | | | 9.47E-04 | | | |
| KIM_LIVER_CANCER_POOR_SURVIVAL_DN | 32 | | -0.73 | -2.04 | | | | <0.001 | | | | 8.79E-04 | | | |
| LEE_LIVER_CANCER_SURVIVAL_UP | 124 | | -0.58 | -2.06 | | | | <0.001 | | | | 7.01E-04 | | | |
| RUIZ_TNC_TARGETS_UP | 121 | | -0.59 | -2.08 | | | | <0.001 | | | | 3.64E-04 | | | |
| BLANCO_MELO_HUMAN_PARAINFLUENZA_VIRUS_3 | 83 | | -0.62 | -2.08 | | | | <0.001 | | | | 3.78E-04 | | | |
| _INFECTION_A594_CELLS_DN |  | |  |  | | | |  | | | |  | | | |
| MARTENS_TRETINOIN_RESPONSE_UP | 252 | | -0.56 | -2.12 | | | | <0.001 | | | | 1.97E-04 | | | |
| BLANCO_MELO_COVID19_SARS_COV_2_INFECTION_CALU3_CELLS_UP | 166 | | -0.59 | -2.13 | | | | <0.001 | | | | 2.06E-04 | | | |
| HOSHIDA_LIVER_CANCER_SUBCLASS_S3 | 212 | | -0.57 | -2.14 | | | | <0.001 | | | | 1.30E-04 | | | |
| STEARMAN_TUMOR_FIELD_EFFECT_UP | 25 | | -0.81 | -2.17 | | | | <0.001 | | | | 9.04E-05 | | | |
| ANDERSEN_LIVER_CANCER_KRT19_DN | 56 | | -0.69 | -2.18 | | | | <0.001 | | | | 4.75E-05 | | | |
| SEMENZA_HIF1_TARGETS | 30 | | -0.77 | -2.18 | | | | <0.001 | | | | 5.00E-05 | | | |
| QI_HYPOXIA | 114 | | -0.62 | -2.2 | | | | <0.001 | | | | <0.001 | | | |
| KOBAYASHI_EGFR_SIGNALING_24HR_UP | 79 | | -0.67 | -2.21 | | | | <0.001 | | | | <0.001 | | | |
| OHGUCHI_LIVER_HNF4A_TARGETS_DN | 97 | | -0.65 | -2.22 | | | | <0.001 | | | | <0.001 | | | |
| SABATES_COLORECTAL_ADENOMA_DN | 99 | | -0.65 | -2.22 | | | | <0.001 | | | | <0.001 | | | |
| CADWELL_ATG16L1_TARGETS_UP | 55 | | -0.7 | -2.23 | | | | <0.001 | | | | <0.001 | | | |
| YAO_TEMPORAL_RESPONSE_TO_PROGESTERONE_CLUSTER_0 | 61 | | -0.7 | -2.23 | | | | <0.001 | | | | <0.001 | | | |
| WINTER_HYPOXIA_METAGENE | 193 | | -0.61 | -2.25 | | | | <0.001 | | | | <0.001 | | | |
| CAIRO_LIVER_DEVELOPMENT_DN | 153 | | -0.62 | -2.25 | | | | <0.001 | | | | <0.001 | | | |
| MEBARKI_HCC_PROGENITOR_FZD8CRD_DN | 294 | | -0.61 | -2.32 | | | | <0.001 | | | | <0.001 | | | |
| FARDIN_HYPOXIA_11 | 31 | | -0.82 | -2.35 | | | | <0.001 | | | | <0.001 | | | |
| LEONARD_HYPOXIA | 36 | | -0.81 | -2.38 | | | | <0.001 | | | | <0.001 | | | |
| MANALO_HYPOXIA_UP | 150 | | -0.67 | -2.38 | | | | <0.001 | | | | <0.001 | | | |
| MENSE_HYPOXIA_UP | 94 | | -0.7 | -2.4 | | | | <0.001 | | | | <0.001 | | | |
| HSIAO_LIVER_SPECIFIC_GENES | 177 | | -0.67 | -2.47 | | | | <0.001 | | | | <0.001 | | | |
| ELVIDGE_HIF1A_TARGETS_DN | 74 | | -0.82 | -2.68 | | | | <0.001 | | | | <0.001 | | | |
| ELVIDGE_HIF1A_AND_HIF2A_TARGETS_DN | 88 | | -0.8 | -2.7 | | | | <0.001 | | | | <0.001 | | | |
| ELVIDGE_HYPOXIA_BY_DMOG_UP | 113 | | -0.77 | -2.72 | | | | <0.001 | | | | <0.001 | | | |
| ELVIDGE_HYPOXIA_UP | 143 | | -0.77 | -2.75 | | | | <0.001 | | | | <0.001 | | | |
| Abbreviation: ES, enrichment score; NES, normalized ES; FDR, false discovery rate. | | | | | | | | | | |  | | | | | |
