# Supplementary material for: Heterogeneity, Inherent and Acquired Drug Resistance in Patient-Derived Organoids Models of Primary Liver Cancer
Source: Research Square preprint supplement (doi:10.21203/rs.3.rs-1229184/v1), 2022-01-10
Supplement: Supplementary file 3 [file c434dcee3c50ef777d4f4c7b.docx]

| Table S2. IC50 of DMSO-treated and Sor-re towards sorafenib treatment | | | |
| --- | --- | --- | --- |
| DMSO | IC50 (μM) | Sor-re | IC50 (μM) |
| HCC-10 | 3.815±0.064 | HCC-10-S | 6.066±0.0105 |
| HCC-25 | 1.395±0.037 | HCC-25-S | 5.727±0.0515 |
| HCC-52 | 3.757±0.3975 | HCC-52-S | 7.556±0.226 |
| HCC-118 | 2.522±0.023 | HCC-118-S | 5.841±0.3605 |
| Abbreviation: HCC, hepatocellular carcinoma; Sor-re, sorafenib-resistant. | | | |
